# Supplementary material for: Electrochemical synthesis of ultrafast and gram-scale surfactant-free tellurium nanowires by gas–solid transformation and their applications as supercapacitor electrodes for p-doping of graphene transistors
Source: Royal Society of Chemistry journal article supplement (doi:10.1039/c5nr00876j), 2015-01-01
Supplement: c5nr00876j1.pdf [file c5nr00876j1.pdf]

## Supplementary information

### Electrochemical Synthesis of Ultrafast and Gram-Scale Surfactant-free Tellurium Nanowires by Gas-Solid Transformation and its Applications on Supercapacitor Electrode and P-doping of Graphene Transistor

Hung-Wei Tsai<sup>†</sup>, Alireza Yaghoubi<sup>‡</sup>, Tsung-Cheng Chan<sup>†</sup>, Chun-Chieh Wang<sup>§</sup>, Wei-Ting Liu<sup>†</sup>, Chien-Neng Liao<sup>†</sup>, Shih-Yuan Lu<sup>§</sup>, Lih-Juann Chen<sup>†</sup>, and Yu-Lun Chueh<sup>†,\*</sup>

<sup>†</sup>Department of Materials Science and Engineering, National Tsing Hua University, 30013, Taiwan.

<sup>§</sup>Department of Chemical Engineering, National Tsing Hua University, Hsinchu 30013, Taiwan.

<sup>‡</sup>Center for High Impact Research, University of Malaya, Kuala Lumpur 50603, Malaysia

\*e-mail: [ylchueh@mx.nthu.edu.tw](mailto:ylchueh@mx.nthu.edu.tw)

**Video S1.** The supplementary video presents an overview of the experimental setup as well as the electrochemical reaction which leads to the synthesis of tellurium nanowire (dark precipitate) from a bismuth telluride bulk working electrode.

**Evidence of H<sub>2</sub>Te gas:** The evolution of H<sub>2</sub>Te gas during the electrochemical reaction was verified by suspending a Si substrate above the electrolyte surface (figure S1 a,b), and the H<sub>2</sub>Te derived tellurium was detected after the electrolysis. Three peaks of H<sub>2</sub>Te derived tellurium in Raman spectrum located at 92.4, 121.6, and 141.1 cm<sup>-1</sup> are corresponding to E<sup>l</sup>(transverse), A<sub>1</sub>, and E<sup>u</sup>(transverse) Raman-active modes, respectively. These peaks are also consistent with the Raman spectrum from pure bulk Te (figure S1 c). The SEM image of H<sub>2</sub>Te derived tellurium on Si substrate shows a blade shape rather than nanowire shape in electrolyte solution (figure S1 d).

**Figure S1.** (a)(b) Two-electrode system for the Te NWs synthesis and a suspended Si substrate upon the electrolyte. (c) Raman spectra of Te bulk and H<sub>2</sub>Te derived Te. (d) SEM image of H<sub>2</sub>Te derived Te.
